# Supplementary material for: Clinical and Psychosocial Predictors of Suicide Attempts and Nonsuicidal Self-Injury in the Adolescent Depression Antidepressants and Psychotherapy Trial (ADAPT)
Source: Atypon-hosted journal article supplement (doi:10.1176/appi.ajp.2010.10050718), 2011-02-02
Supplement: ajp_168_05_495_01.pdf [file ajp_168_05_495_01.pdf]

**TABLE S1. Univariate Predictors of a Suicide Attempt and Nonsuicidal Self-Harm During 28-Week Follow-Up<sup>a</sup>**

|                                                         | Presence of at Least One Suicide Attempt |         |           |         |                       |              |          | Presence of at Least One Act of Nonsuicidal Self-Injury |         |        |        |                       |              |         |
|---------------------------------------------------------|------------------------------------------|---------|-----------|---------|-----------------------|--------------|----------|---------------------------------------------------------|---------|--------|--------|-----------------------|--------------|---------|
|                                                         | Present                                  |         | Absent    |         | Univariate Odds Ratio | Difference   | p        | Present                                                 |         | Absent |        | Univariate Odds Ratio | Difference   | p       |
|                                                         | Mean or N                                | SD or % | Mean or N | SD or % |                       |              |          | Mean or N                                               | SD or % |        |        |                       |              |         |
| <b>Baseline Clinical Variables</b>                      |                                          |         |           |         |                       |              |          |                                                         |         |        |        |                       |              |         |
| CDRS-R suicidality item [median (IQR)]                  | 5                                        | 3–7     | 3         | 1–5     | 1.81                  | Z=3.4        | 0.001    | 5                                                       | 3–7     | 3      | 1–5    | 1.61                  | Z=2.8        | 0.005   |
| Suicide attempt in month before baseline                |                                          |         |           |         |                       |              |          |                                                         |         |        |        |                       |              |         |
| Present (N=28)                                          | 14                                       | 50%     | 14        | 50%     | 2.78                  | $\chi^2=6.1$ | 0.014    | 13                                                      | 48%     | 14     | 52%    | 1.76                  | $\chi^2=1.8$ | 0.18    |
| Absent (N=136)                                          | 36                                       | 26%     | 100       | 74%     |                       |              |          | 47                                                      | 35%     | 89     | 65%    |                       |              |         |
| Nonsuicidal self-harm in month before baseline          |                                          |         |           |         |                       |              |          |                                                         |         |        |        |                       |              |         |
| Present (N=58)                                          | 31                                       | 53%     | 27        | 47%     | 5.20                  | $\chi^2=22$  | <0.0005  | 39                                                      | 68%     | 18     | 32%    | 9.21                  | $\chi^2=39$  | <0.0005 |
| Absent (N=105)                                          | 19                                       | 18%     | 86        | 82%     |                       |              |          | 20                                                      | 19%     | 85     | 81%    |                       |              |         |
| Depression severity (nonsuicidality CDRS-R items)       | 58.7                                     | 9.3     | 55.4      | 8.2     | 1.50                  | t=2.3        | 0.023    | 58.4                                                    | 8.6     | 55.2   | 8.5    | 1.48                  | Z=2.2        | 0.026   |
| K-SADS-PL hopelessness                                  |                                          |         |           |         |                       |              |          |                                                         |         |        |        |                       |              |         |
| Present (N=55)                                          | 23                                       | 42%     | 32        | 58%     | 2.18                  | $\chi^2=5.0$ | 0.025    | 28                                                      | 51%     | 27     | 49%    | 2.46                  | $\chi^2=7.1$ | 0.008   |
| Absent (N=109)                                          | 27                                       | 25%     | 82        | 75%     |                       |              |          | 32                                                      | 30%     | 76     | 70%    |                       |              |         |
| Anxiety disorder                                        |                                          |         |           |         |                       |              |          |                                                         |         |        |        |                       |              |         |
| Present (N=107)                                         | 35                                       | 37%     | 72        | 67%     | 1.36                  | $\chi^2=0.7$ | 0.4      | 45                                                      | 42%     | 61     | 58%    | 2.07                  | $\chi^2=4.1$ | 0.042   |
| Absent (N=57)                                           | 15                                       | 26%     | 42        | 74%     |                       |              |          | 15                                                      | 26%     | 42     | 74%    |                       |              |         |
| Behavior disorder                                       |                                          |         |           |         |                       |              |          |                                                         |         |        |        |                       |              |         |
| Present (N=27)                                          | 5                                        | 19%     | 22        | 81%     | 0.48                  | $\chi^2=0.2$ | 0.2      | 8                                                       | 30%     | 19     | 70%    | 0.67                  | $\chi^2=0.8$ | 0.4     |
| Absent (N=136)                                          | 44                                       | 32%     | 92        | 67%     |                       |              |          | 52                                                      | 39%     | 83     | 61%    |                       |              |         |
| Duration of depression, weeks [median (IQR)]            | 52                                       | 24–104  | 37        | 20–104  | 0.92                  | Z=0.6        | 0.5      | 42                                                      | 24–104  | 38     | 19–104 | 1.09                  | Z=0.8        | 0.4     |
| <b>Baseline Demographic and Environmental Variables</b> |                                          |         |           |         |                       |              |          |                                                         |         |        |        |                       |              |         |
| Family functioning <sup>b</sup>                         | 31.0                                     | 6.4     | 25.7      | 6.4     | 2.48                  | t=4.7        | < 0.0005 | 28.8                                                    | 6.3     | 26.7   | 6.9    | 1.38                  | t=1.8        | 0.067   |
| Friendship functioning <sup>b</sup>                     | 12.0                                     | 4.1     | 13.2      | 4.8     | 0.76                  | t=1.5        | 0.13     | 12.2                                                    | 4.1     | 13.3   | 4.8    | 0.77                  | t=1.5        | 0.14    |
| Maternal mental health (GHQ) <sup>b</sup> N=138         | 34.5                                     | 16      | 33.4      | 18      | 1.00                  | Z=.7         | 0.5      | 32.5                                                    | 18      | 33.9   | 17     | 1.00                  | Z=.6         | 0.6     |
| Paternal mental health (GHQ) <sup>b</sup> N=50          | 25.0                                     | 12      | 21.5      | 13      | 1.02                  | Z=1.1        | 0.3      | 22.0                                                    | 11      | 23.1   | 13     | 0.99                  | Z=0.0        | 1.0     |
| Female (N=122)                                          | 39                                       | 32%     | 83        | 68%     | 1.32                  | $\chi^2=.5$  | 0.5      | 51                                                      | 42%     | 70     | 58%    | 2.67                  | $\chi^2=5.8$ | 0.016   |
| Male (N=42)                                             | 11                                       | 26%     | 31        | 74%     |                       |              |          | 9                                                       | 21%     | 33     | 79%    |                       |              |         |
| Age                                                     | 14.4                                     | 1.1     | 14.2      | 1.3     | 1.17                  | Z=.9         | 0.4      | 14.2                                                    | 1.3     | 14.3   | 1.2    | 0.88                  | Z=0.9        | 0.4     |
| <b>Treatment and Clinical Outcomes During Follow-Up</b> |                                          |         |           |         |                       |              |          |                                                         |         |        |        |                       |              |         |
| Treatment group                                         |                                          |         |           |         |                       |              |          |                                                         |         |        |        |                       |              |         |
| SSRI plus CBT (n=85)                                    | 26                                       | 31%     | 59        | 69%     | 1.01                  | $\chi^2=.00$ | 1.0      | 35                                                      | 41%     | 50     | 59%    | 1.48                  | $\chi^2=1.5$ | 0.2     |
| SSRI plus routine care (n=79)                           | 24                                       | 30%     | 55        | 70%     |                       |              |          | 25                                                      | 32%     | 53     | 68%    |                       |              |         |
| CDRS-R at 28 weeks                                      | 38.9                                     | 16      | 34.0      | 13      | 1.42                  | Z=1.6        | 0.11     | 40.9                                                    | 16      | 32.2   | 12     | 1.95                  | Z=3.3        | 0.001   |
| Suicide attempt during follow-up                        | N/A                                      |         |           |         |                       |              |          |                                                         |         |        |        |                       |              |         |
| Present (N=50)                                          |                                          |         |           |         |                       |              |          | 26                                                      | 52%     | 24     | 48%    | 2.52                  | $\chi^2=7.2$ | 0.007   |
| Absent (N=113)                                          |                                          |         |           |         |                       |              |          | 34                                                      | 30%     | 79     | 70%    |                       |              |         |
| Nonsuicidal self-injury during follow-up                | N/A                                      |         |           |         |                       |              |          |                                                         |         |        |        |                       |              |         |
| Present (N=60)                                          | 26                                       | 43%     | 34        | 57%     | 2.52                  | $\chi^2=7.2$ | 0.007    |                                                         |         |        |        |                       |              |         |
| Absent (N=103)                                          | 24                                       | 23%     | 79        | 77%     |                       |              |          |                                                         |         |        |        |                       |              |         |

<sup>a</sup> Values are given as mean (standard deviation) unless otherwise stated. For continuous variables except age, odds ratios use z-standardized scores.

<sup>b</sup> Higher scores on the family function and parental health questionnaires and lower scores on the friendship function questionnaire represent greater impairment. N values represent numbers for those with suicide attempt data; information was missing on nonsuicidal self-harm data for one individual.
